# Supplementary material
Source: PubMed Central journal article supplement (PMC9630929)
Supplement: NIHMS1843423-supplement-SI_001.pdf [file NIHMS1843423-supplement-SI_001.pdf]

# Supporting Information

## Selective and cell-active PBRM1 bromodomain inhibitors discovered through NMR fragment screening

*Shifali Shishodia,<sup>1,\*</sup> Raymundo Nuñez,<sup>1</sup> Brayden P. Strohmier,<sup>2</sup> Karina L. Bursch,<sup>1</sup> Christopher J. Goetz,<sup>1</sup> Michael D. Olp,<sup>1</sup> Davin R. Jensen,<sup>1</sup> Tyler G. Fenske,<sup>1</sup> Sandra C. Ordonez-Rubiano,<sup>2</sup> Maya E. Blau,<sup>1</sup> Mallory K. Roach,<sup>2</sup> Francis C. Peterson,<sup>1</sup> Brian F. Volkman,<sup>1</sup> Emily C. Dykhuizen,<sup>2</sup> Brian C. Smith<sup>1,\*</sup>*

<sup>1</sup>Department of Biochemistry, Program in Chemical Biology, Medical College of Wisconsin, Milwaukee, WI 53226, United States

<sup>2</sup>Department of Medicinal Chemistry and Molecular Pharmacology, Purdue University, West Lafayette, IN 47907, United States

\*Shifali Shishodia. Email: [sshishodia@mcw.edu](mailto:sshishodia@mcw.edu)

\*Brian C. Smith. Email: [brismith@mcw.edu](mailto:brismith@mcw.edu)

## Supplementary Figures and Tables

|                                                                                                                  |     |
|------------------------------------------------------------------------------------------------------------------|-----|
| Figure S1: Summary of protein-detected NMR-based fragment screen of the Zenobia Library targeting PBRM1-BD2..... | S3  |
| Figure S2: Titrations data of Compound <b>6</b> .....                                                            | S4  |
| Figure S3: Titrations data of Compound <b>6a</b> .....                                                           | S5  |
| Figure S4: Titrations data of Compound <b>6b</b> .....                                                           | S6  |
| Figure S5: Titrations data of Compound <b>6c</b> .....                                                           | S7  |
| Figure S6: Titrations data of Compound <b>6d</b> .....                                                           | S8  |
| Figure S7: Titrations data of Compound <b>6e</b> .....                                                           | S9  |
| Figure S8: Titrations data of Compound <b>6g</b> .....                                                           | S10 |
| Figure S9: Titrations data of Compound <b>6h</b> .....                                                           | S11 |
| Figure S10: Titrations data of Compound <b>6i</b> .....                                                          | S12 |
| Figure S11: Titrations data of Compound <b>6j</b> .....                                                          | S13 |

|                                                                                                                                  |     |
|----------------------------------------------------------------------------------------------------------------------------------|-----|
| Figure S12: IC <sub>50</sub> curves from AlphaScreen assays.....                                                                 | S14 |
| Figure S13: Cellular activity of PBRM1-BD2 inhibitors.....                                                                       | S17 |
| Figure S14: <sup>1</sup> H- <sup>15</sup> N HSQC spectrum of apo U- <sup>15</sup> N PBRM1-BD2.....                               | S19 |
| Figure S15: <sup>1</sup> H- <sup>15</sup> N HSQC spectrum of U- <sup>15</sup> N PBRM1-BD2 bound to <b>16</b> .....               | S20 |
| Figure S16: HPLC chromatograms of promising lead PBRM1 bromodomain inhibitors.....                                               | S21 |
| Table S1: Selectivity profile of selected compounds across bromodomain family using DSF...                                       | S22 |
| Table S2: Binding of the analogs of the second-best hit ( <b>6</b> ) to PBRM1-BD2 as observed by DSF and AlphaScreen assays..... | S23 |
| Scheme S1: Synthetic route to compounds <b>7</b> and <b>8</b> .....                                                              | S24 |
| Scheme S2: Synthetic route to compounds <b>27</b> and <b>28</b> .....                                                            | S24 |
| Scheme S3: Synthetic route to benzoxazin-4-one ( <b>29</b> ) and quinazolin-4-one ( <b>30</b> ).....                             | S24 |
| Scheme S4: Synthetic route to literature compound <b>2</b> .....                                                                 | S25 |
| Scheme S5: Synthetic route to analogs of <b>6</b> .....                                                                          | S25 |
| Scheme S6: General Procedure A: Synthesis of aminobenzamides.....                                                                | S25 |
| Scheme S7: General Procedure B: Synthesis of 2,3-dihydroquinazalinones .....                                                     | S25 |
| References.....                                                                                                                  | S26 |

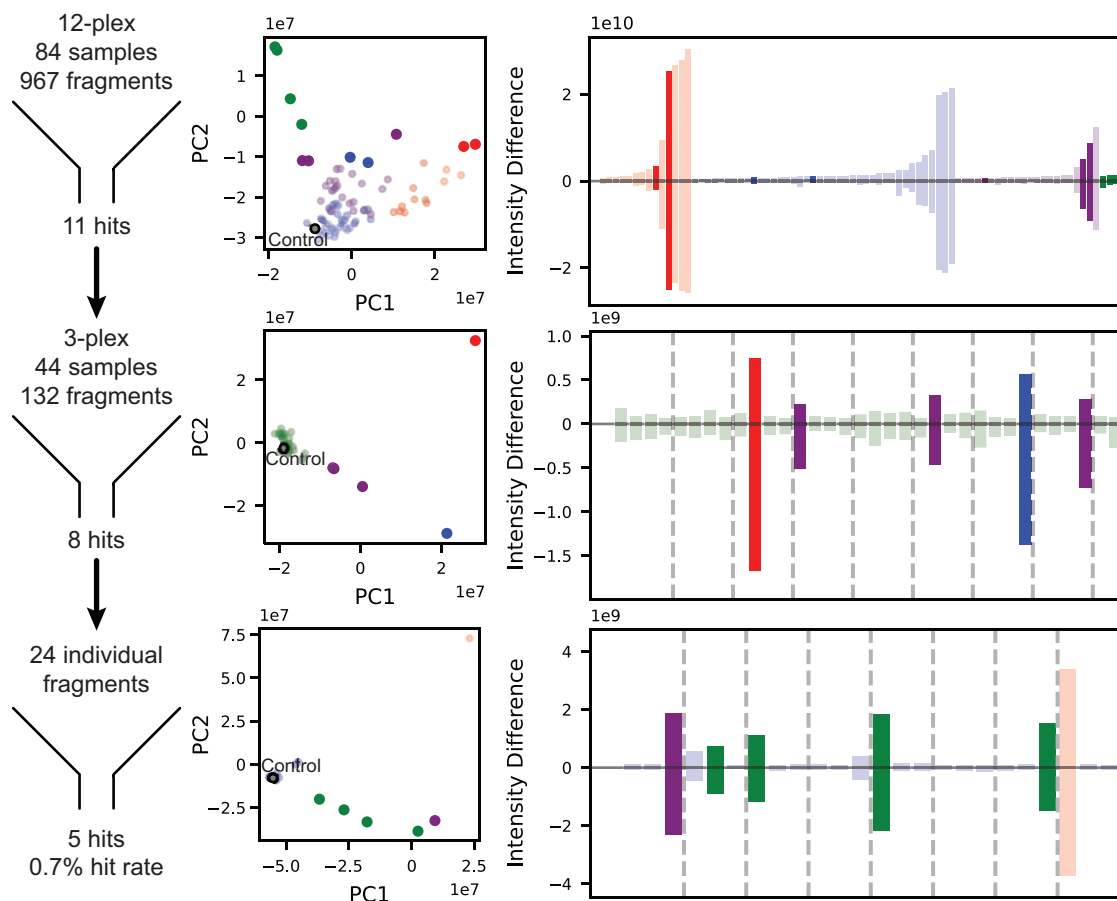

**Figure S1.** Summary of protein-detected NMR-based fragment screen of the Zenobia Library targeting PBRM1-BD2. 967 fragments were screened in pools of 12, 3, or individual compounds, and hits were identified through stepwise parsing of selected samples, yielding a final hit rate of 0.7% (left column). At each stage of parsing, identification of hit samples was aided by principal component analysis (middle column) and difference intensity analysis (right column) of the 2D HMQC spectra. Samples are colored according to *k*-means clustering of principal components. Throughout the screening process, samples selected as hits are represented as solid circles and bars. Control samples in the PCA plots are represented as grey circles outlined black.

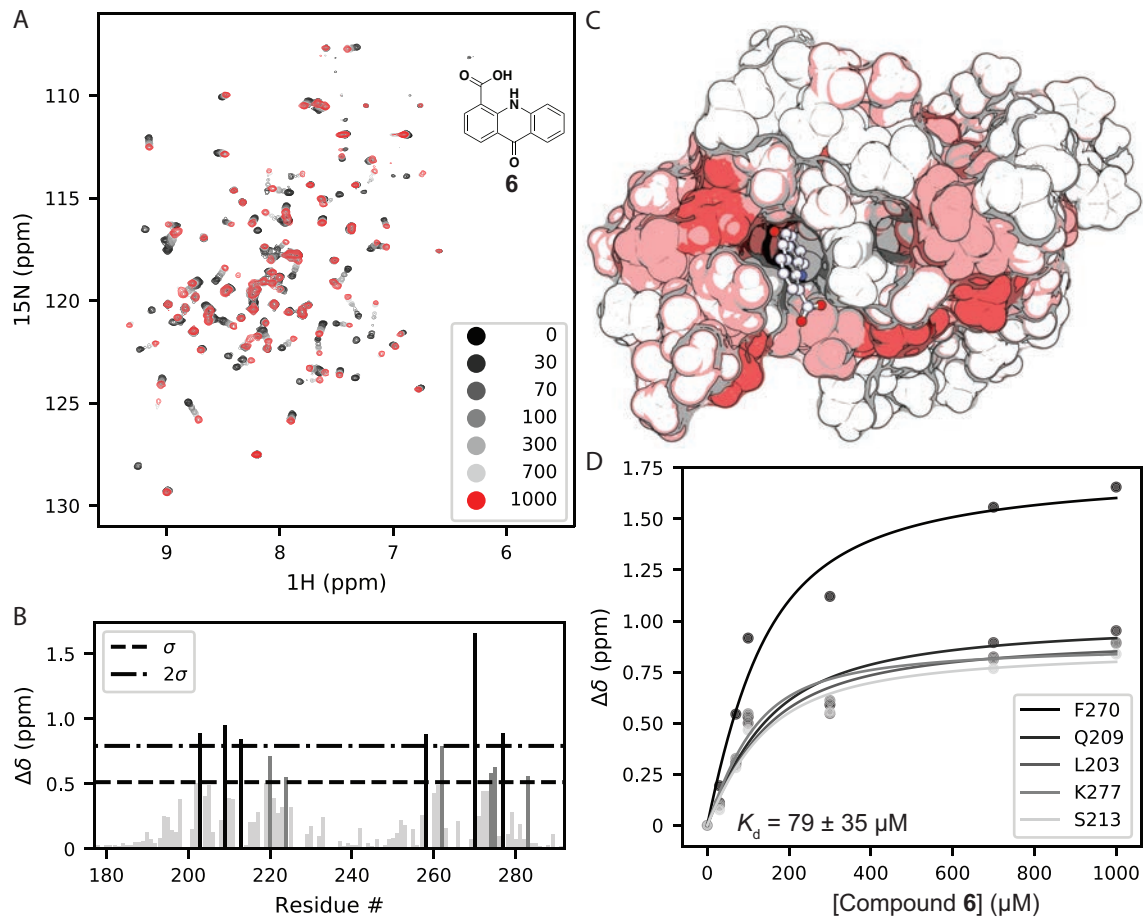

**Figure S2.** (A)  $^1\text{H}$ ,  $^{15}\text{N}$  SOFAST-HMQC overlays of PBRM1-BD2 titrated with increasing concentrations of **6** (structure in insert). (B) Quantification of total chemical shift perturbations ( $^1\text{H}/^{15}\text{N}$   $\Delta\delta$  chemical shift) manifested by **6** (1 mM) for individual amino acid residues of PBRM1-BD2. (C) Mapping of substantially perturbed residues on the crystal structure of PBRM1-BD2 (PDB ID: 3LJW). The *in silico* docked pose of **6** into the active site of PBRM1-BD2 is included. Residues displaying CSPs  $>2\sigma$  (red), between  $1\sigma$  and  $2\sigma$  (pink), or  $<1\sigma$  (white) are indicated. (D) Concentration-response curves of indicated residues used to calculate binding affinity ( $K_d = 79 \pm 35 \mu\text{M}$ ) of **6** for PBRM1-BD2 using GraphPad Prism.

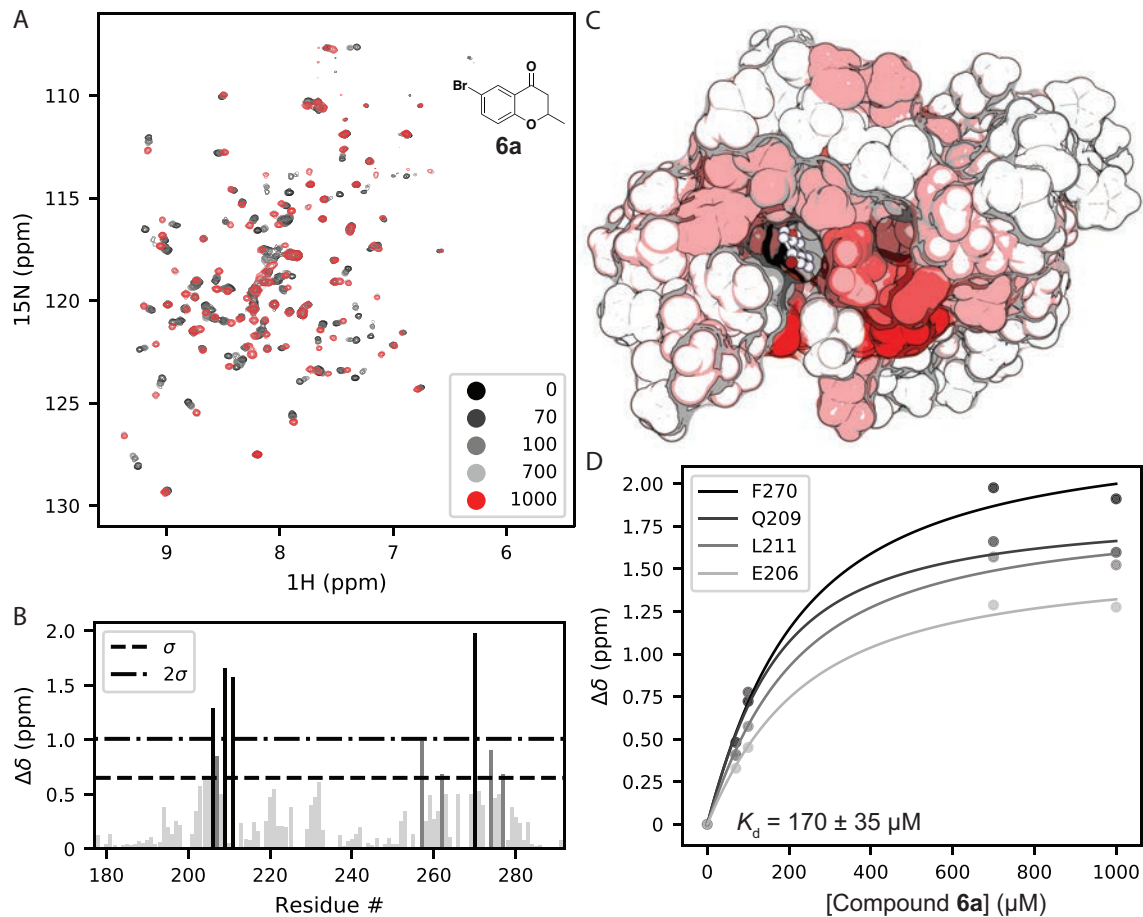

**Figure S3.** (A)  $^1\text{H}$ ,  $^{15}\text{N}$  SOFAST-HMQC overlays of PBRM1-BD2 titrated with increasing concentrations of **6a** (structure in insert). (B) Quantification of total chemical shift perturbations ( $^1\text{H}/^{15}\text{N}$   $\Delta\delta$  chemical shift) manifested by **6a** (1 mM) for individual amino acid residues of PBRM1-BD2. (C) Mapping of substantially perturbed residues on the crystal structure of PBRM1-BD2 (PDB ID: 3LJW). The *in silico* docked pose of **6a** into the active site of PBRM1-BD2 is included. Residues displaying CSPs  $>2\sigma$  (red), between  $1\sigma$  and  $2\sigma$  (pink), or  $<1\sigma$  (white) are indicated. (D) Concentration-response curves of indicated residues used to calculate binding affinity ( $K_d = 170 \pm 35 \mu\text{M}$ ) of **6a** for PBRM1-BD2 using GraphPad Prism.

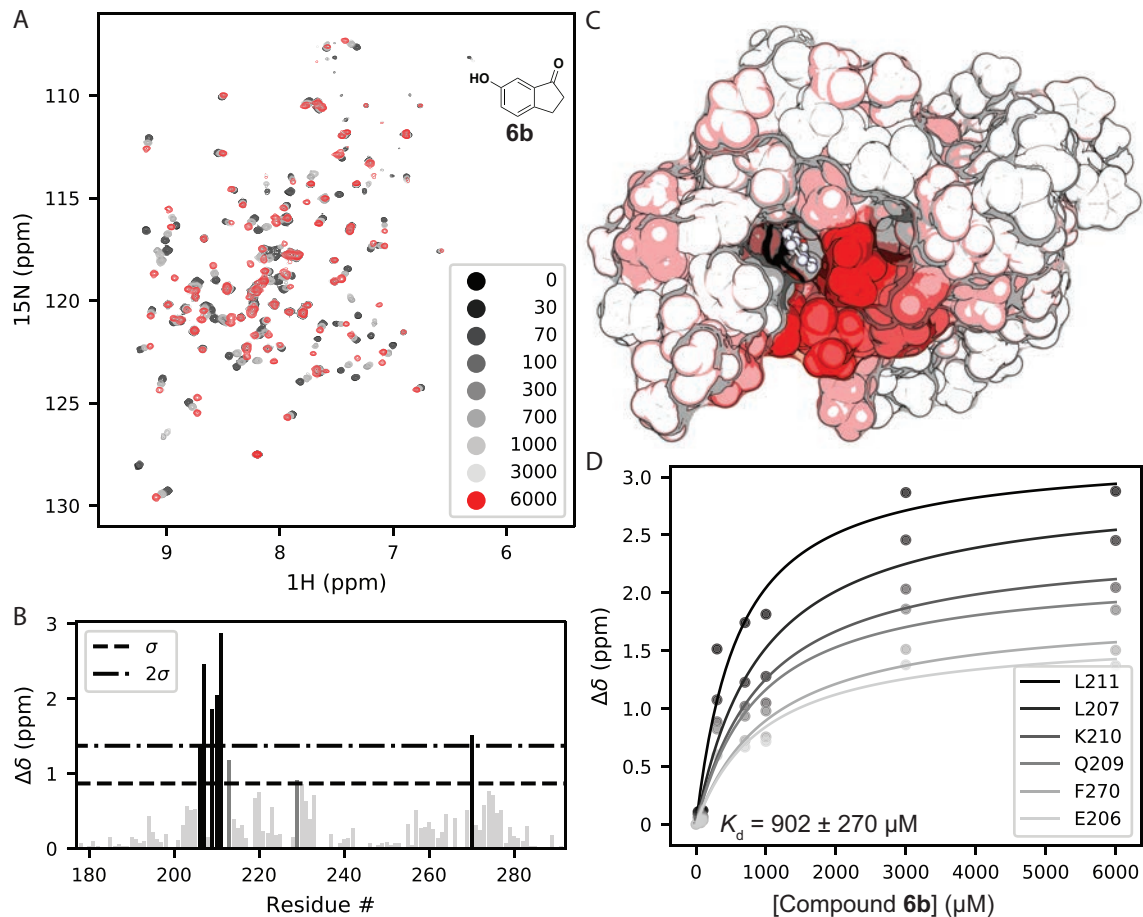

**Figure S4.** (A)  $^1\text{H}$ ,  $^{15}\text{N}$  SOFAST-HMQC overlays of PBRM1-BD2 titrated with increasing concentrations of **6b** (structure in insert). (B) Quantification of total chemical shift perturbations ( $^1\text{H}/^{15}\text{N}$   $\Delta\delta$  chemical shift) manifested by **6b** (6 mM) for individual amino acid residues of PBRM1-BD2. (C) Mapping of substantially perturbed residues on the crystal structure of PBRM1-BD2 (PDB ID: 3LJW). The *in silico* docked pose of **6b** into the active site of PBRM1-BD2 is included. Residues displaying CSPs  $>2\sigma$  (red), between  $1\sigma$  and  $2\sigma$  (pink), or  $<1\sigma$  (white) are indicated. (D) Concentration-response curves of indicated residues used to calculate binding affinity ( $K_d = 902 \pm 270 \mu\text{M}$ ) of **6b** for PBRM1-BD2 using GraphPad Prism.

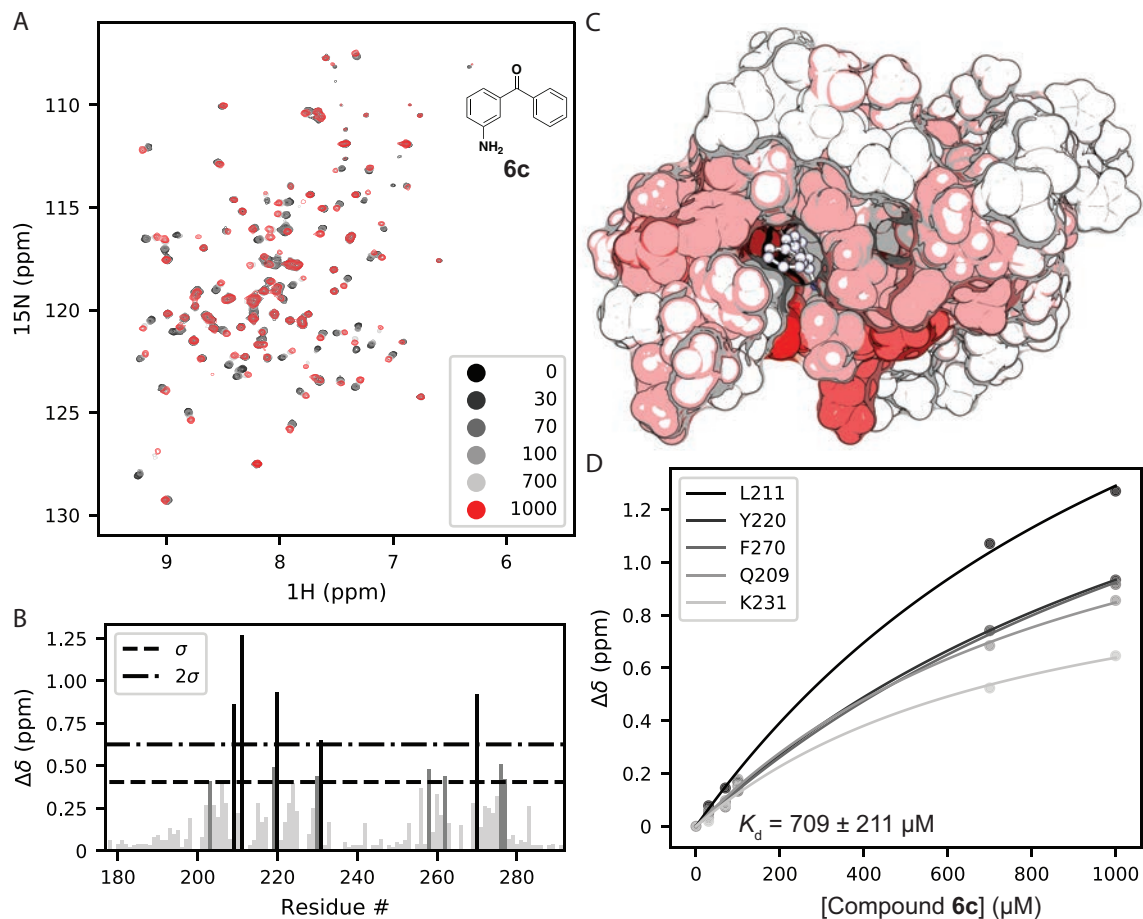

**Figure S5.** (A)  $^1\text{H}$ ,  $^{15}\text{N}$  SOFAST-HMQC overlays of PBRM1-BD2 titrated with increasing concentrations of **6c** (structure in insert). (B) Quantification of total chemical shift perturbations ( $^1\text{H}/^{15}\text{N}$   $\Delta\delta$  chemical shift) manifested by **6c** (1 mM) for individual amino acid residues of PBRM1-BD2. (C) Mapping of substantially perturbed residues on the crystal structure of PBRM1-BD2 (PDB ID: 3LJW). The *in silico* docked pose of **6c** into the active site of PBRM1-BD2 is included. Residues displaying CSPs  $>2\sigma$  (red), between  $1\sigma$  and  $2\sigma$  (pink), or  $<1\sigma$  (white) are indicated. (D) Concentration-response curves of indicated residues used to calculate binding affinity ( $K_d = 709 \pm 211 \mu\text{M}$ ) of **6c** for PBRM1-BD2 using GraphPad Prism.

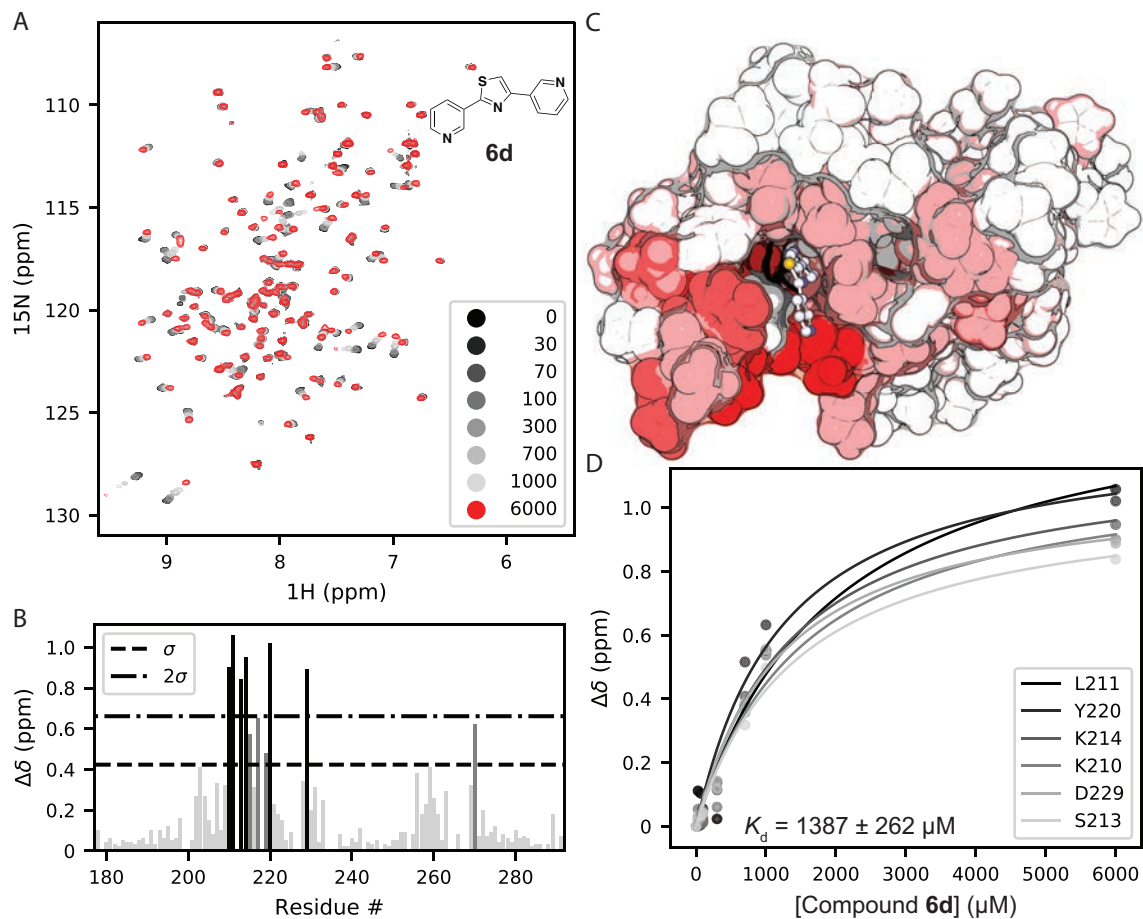

**Figure S6.** (A)  $^1\text{H}$ ,  $^{15}\text{N}$  SOFAST-HMQC overlays of PBRM1-BD2 titrated with increasing concentrations of **6d** (structure in insert). (B) Quantification of total chemical shift perturbations ( $^1\text{H}/^{15}\text{N}$   $\Delta\delta$  chemical shift) manifested by **6d** (6 mM) for individual amino acid residues of PBRM1-BD2. (C) Mapping of substantially perturbed residues on the crystal structure of PBRM1-BD2 (PDB ID: 3LJW). The *in silico* docked pose of **6d** into the active site of PBRM1-BD2 is included. Residues displaying CSPs  $>2\sigma$  (red), between  $1\sigma$  and  $2\sigma$  (pink), or  $<1\sigma$  (white) are indicated. (D) Concentration-response curves of indicated residues used to calculate binding affinity ( $K_d = 1387 \pm 262 \mu\text{M}$ ) of **6d** for PBRM1-BD2 using GraphPad Prism.



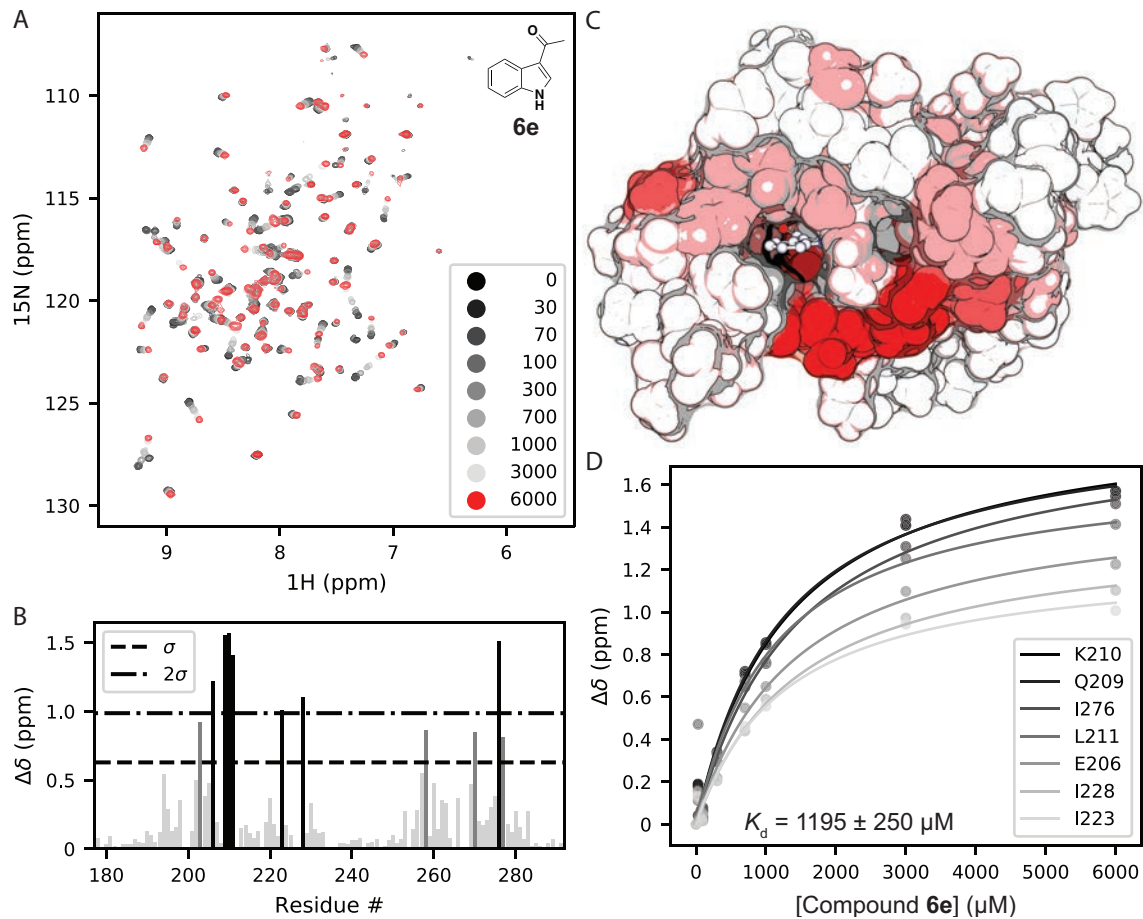

**Figure S7.** (A)  $^1\text{H}$ ,  $^{15}\text{N}$  SOFAST-HMQC overlays of PBRM1-BD2 titrated with increasing concentrations of **6e** (structure in insert). (B) Quantification of total chemical shift perturbations ( $^1\text{H}/^{15}\text{N}$   $\Delta\delta$  chemical shift) manifested by **6e** (6 mM) for individual amino acid residues of PBRM1-BD2. (C) Mapping of substantially perturbed residues on the crystal structure of PBRM1-BD2 (PDB ID: 3LJW). The *in silico* docked pose of **6e** into the active site of PBRM1-BD2 is included. Residues displaying CSPs  $>2\sigma$  (red), between  $1\sigma$  and  $2\sigma$  (pink), or  $<1\sigma$  (white) are indicated. (D) Concentration-response curves of indicated residues used to calculate binding affinity ( $K_d = 1195 \pm 250 \mu\text{M}$ ) of **6e** for PBRM1-BD2 using GraphPad Prism.

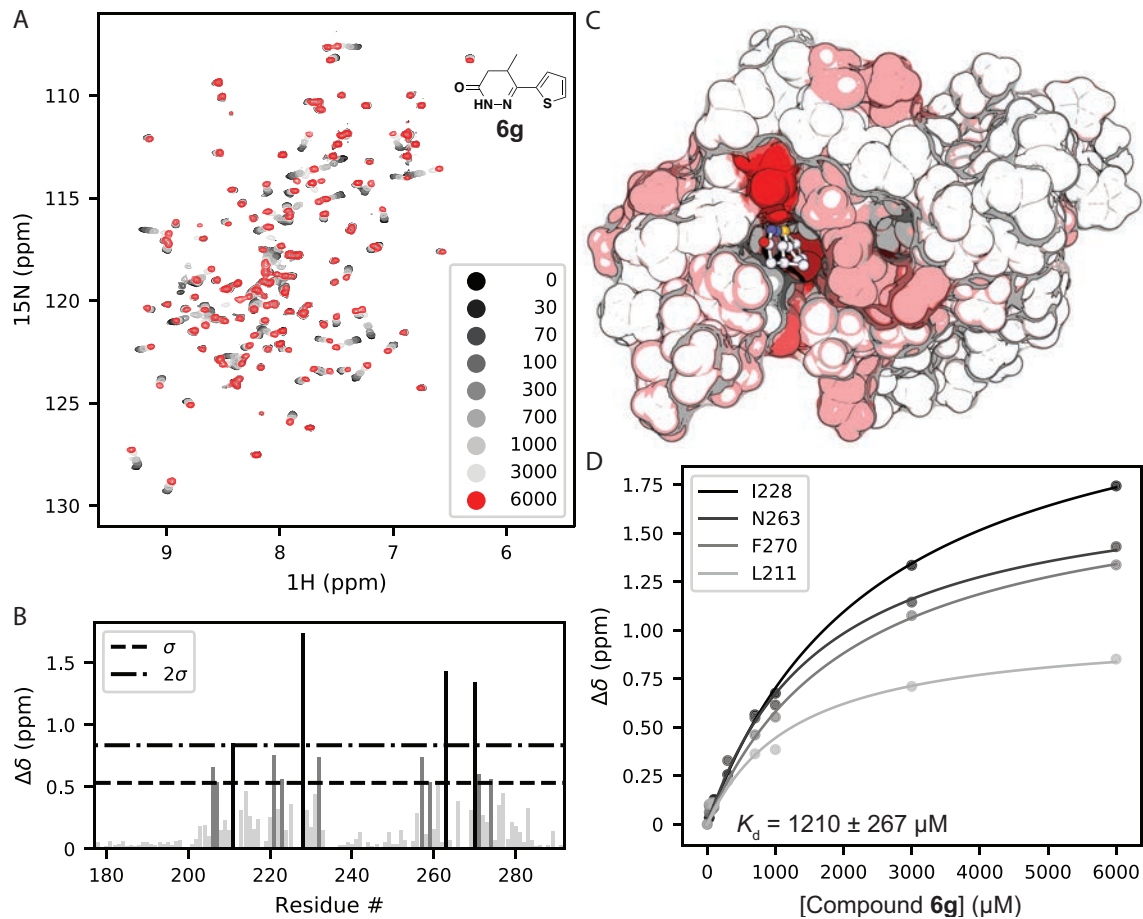

**Figure S8.** (A)  $^1\text{H}$ ,  $^{15}\text{N}$  SOFAST-HMQC overlays of PBRM1-BD2 titrated with increasing concentrations of **6g** (structure in inset). (B) Quantification of total chemical shift perturbations ( $^1\text{H}/^{15}\text{N}$   $\Delta\delta$  chemical shift) manifested by **6g** (6 mM) for individual amino acid residues of PBRM1-BD2. (C) Mapping of substantially perturbed residues on the crystal structure of PBRM1-BD2 (PDB ID: 3LJW). The *in silico* docked pose of **6g** into the active site of PBRM1-BD2 is included. Residues displaying CSPs  $>2\sigma$  (red), between  $1\sigma$  and  $2\sigma$  (pink), or  $<1\sigma$  (white) are indicated. (D) Concentration-response curves of indicated residues used to calculate binding affinity ( $K_d = 1210 \pm 267 \mu\text{M}$ ) of **6g** for PBRM1-BD2 using GraphPad Prism.

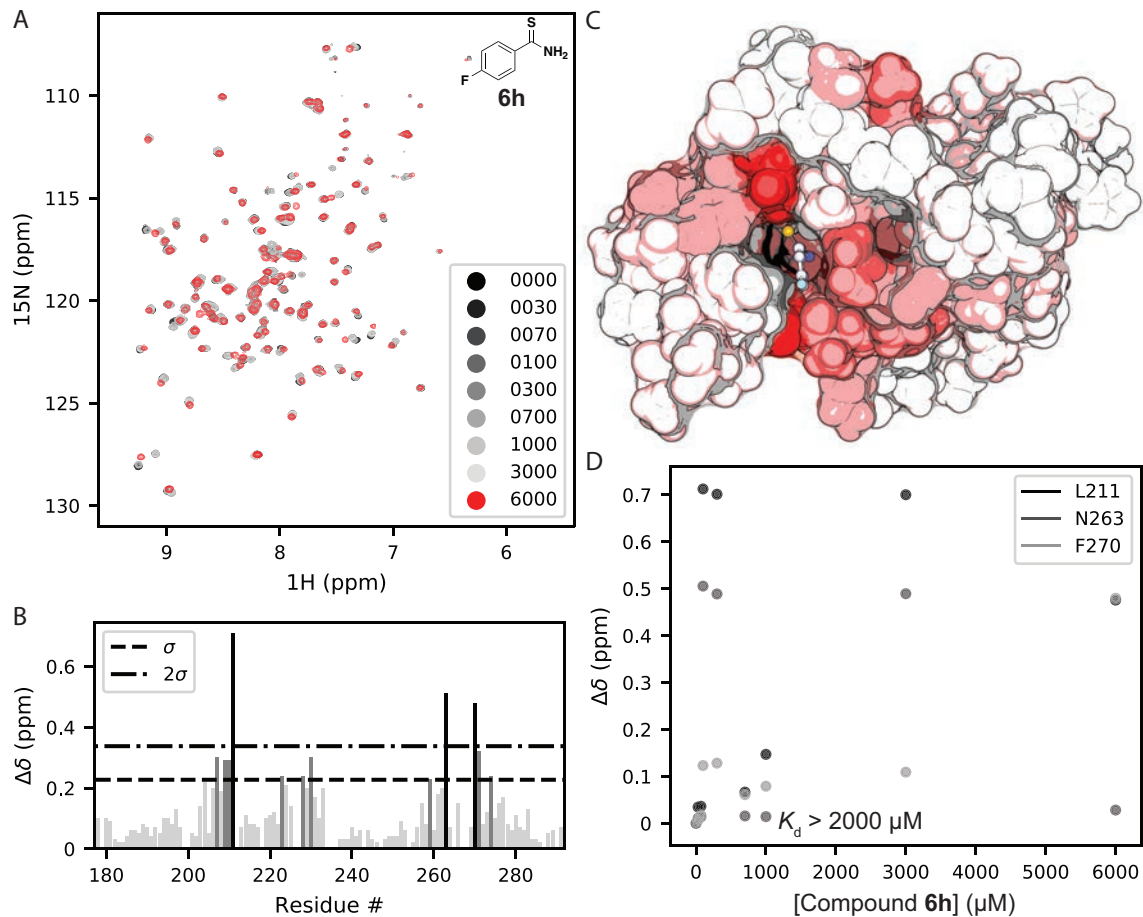

**Figure S9.** (A)  $^1\text{H}$ ,  $^{15}\text{N}$  SOFAST-HMQC overlays of PBRM1-BD2 titrated with increasing concentrations of **6h** (structure in insert). (B) Quantification of total chemical shift perturbations ( $^1\text{H}/^{15}\text{N}$   $\Delta\delta$  chemical shift) manifested by **6h** (1 mM) for individual amino acid residues of PBRM1-BD2. (C) Mapping of substantially perturbed residues on the crystal structure of PBRM1-BD2 (PDB ID: 3LJW). The *in silico* docked pose of **6h** into the active site of PBRM1-BD2 is included. Residues displaying CSPs  $>2\sigma$  (red), between  $1\sigma$  and  $2\sigma$  (pink), or  $<1\sigma$  (white) are indicated. (D) Concentration-response curves of indicated residues used to calculate binding affinity ( $K_d > 2000 \mu\text{M}$ ) of **6h** for PBRM1-BD2 using GraphPad Prism.

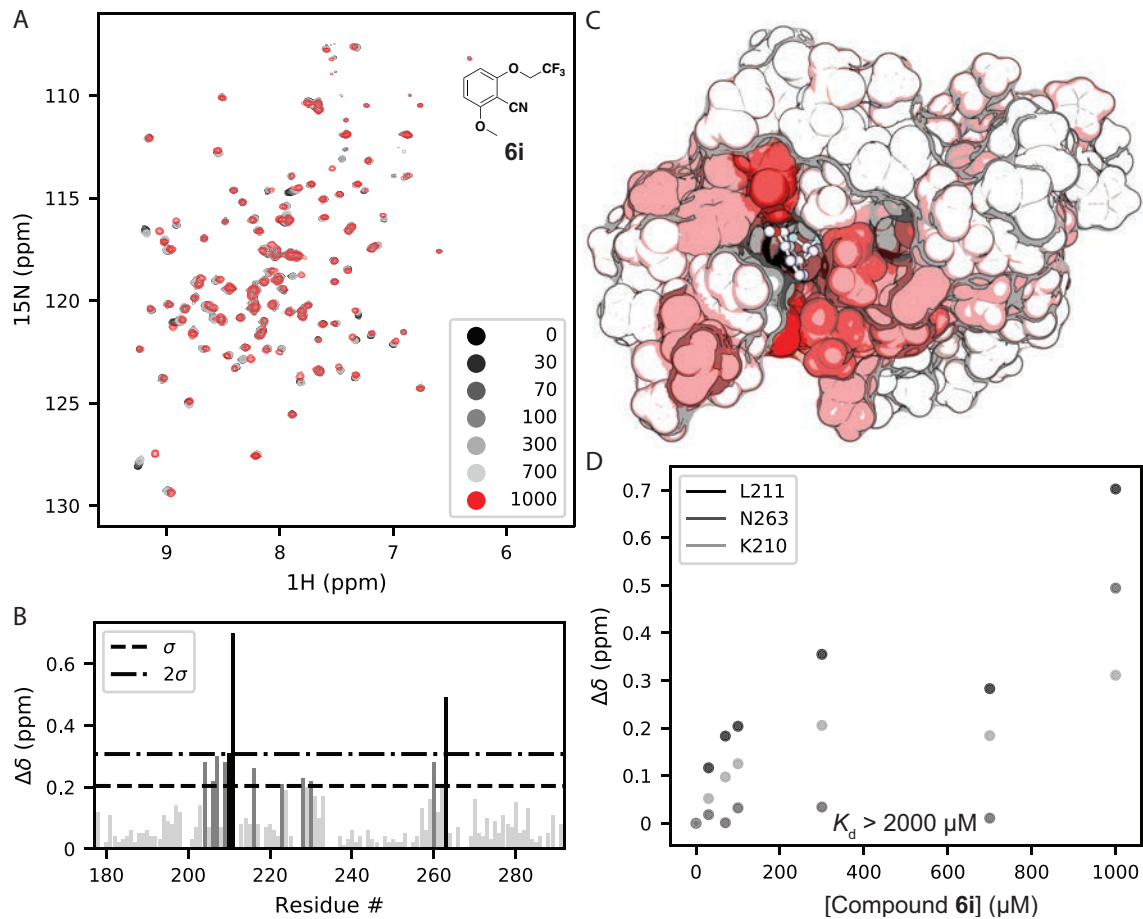

**Figure S10.** (A)  $^1\text{H}$ ,  $^{15}\text{N}$  SOFAST-HMQC overlays of PBRM1-BD2 titrated with increasing concentrations of **6i** (structure in insert). (B) Quantification of total chemical shift perturbations ( $^1\text{H}/^{15}\text{N}$   $\Delta\delta$  chemical shift) manifested by **6i** (1 mM) for individual amino acid residues of PBRM1-BD2. (C) Mapping of substantially perturbed residues on the crystal structure of PBRM1-BD2 (PDB ID: 3LJW). The *in silico* docked pose of **6i** into the active site of PBRM1-BD2 is included. Residues displaying CSPs  $>2\sigma$  (red), between  $1\sigma$  and  $2\sigma$  (pink), or  $<1\sigma$  (white) are indicated. (D) Concentration-response curves of indicated residues used to calculate binding affinity ( $K_d > 2000 \mu\text{M}$ ) of **6i** for PBRM1-BD2 using GraphPad Prism.

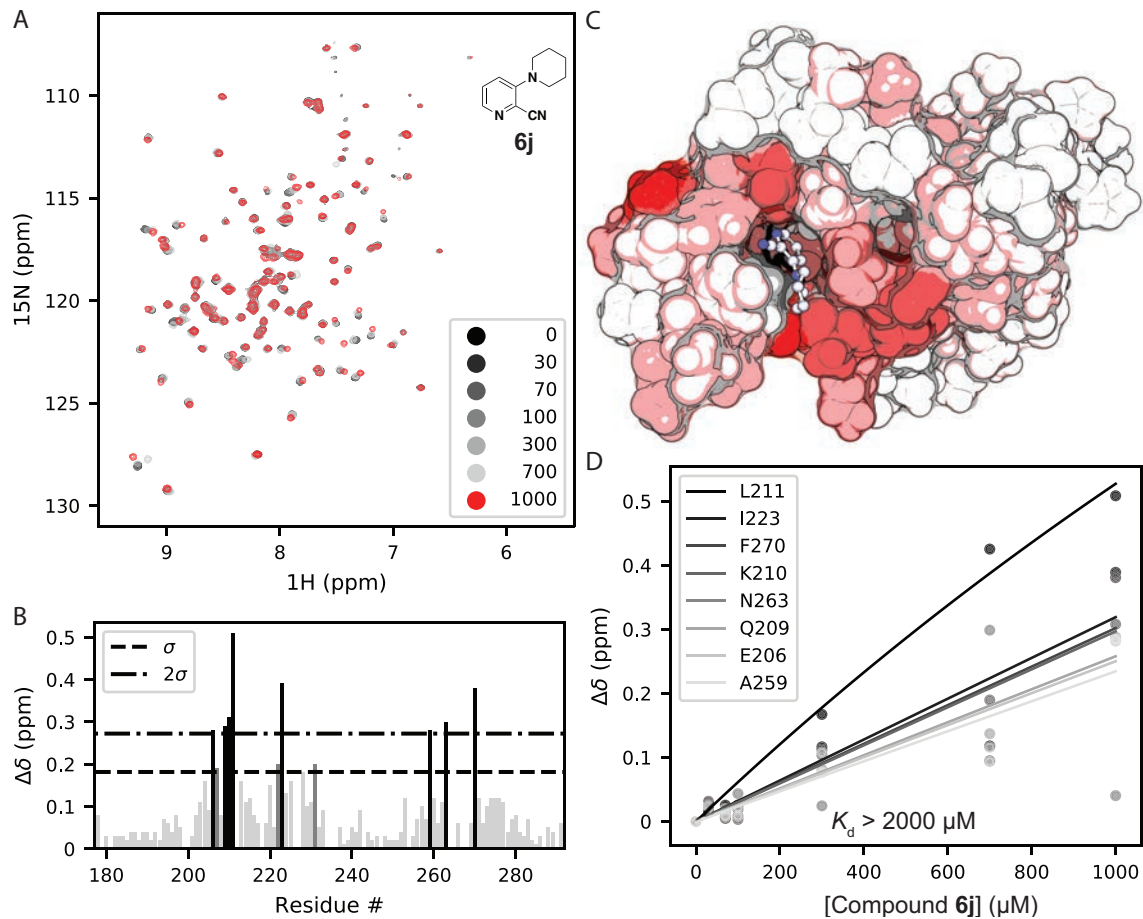

**Figure S11.** (A)  $^1\text{H}$ ,  $^{15}\text{N}$  SOFAST-HMQC overlays of PBRM1-BD2 titrated with increasing concentrations of **6j** (structure in insert). (B) Quantification of total chemical shift perturbations ( $^1\text{H}/^{15}\text{N}$   $\Delta\delta$  chemical shift) manifested by **6j** (1 mM) for individual amino acid residues of PBRM1-BD2. (C) Mapping of substantially perturbed residues on the crystal structure of PBRM1-BD2 (PDB ID: 3LJW). The *in silico* docked pose of **6j** into the active site of PBRM1-BD2 is included. Residues displaying CSPs  $>2\sigma$  (red), between  $1\sigma$  and  $2\sigma$  (pink), or  $<1\sigma$  (white) are indicated. (D) Concentration-response curves of indicated residues used to calculate binding affinity ( $K_d > 2000 \mu\text{M}$ ) of **6j** for PBRM1-BD2 using GraphPad Prism.

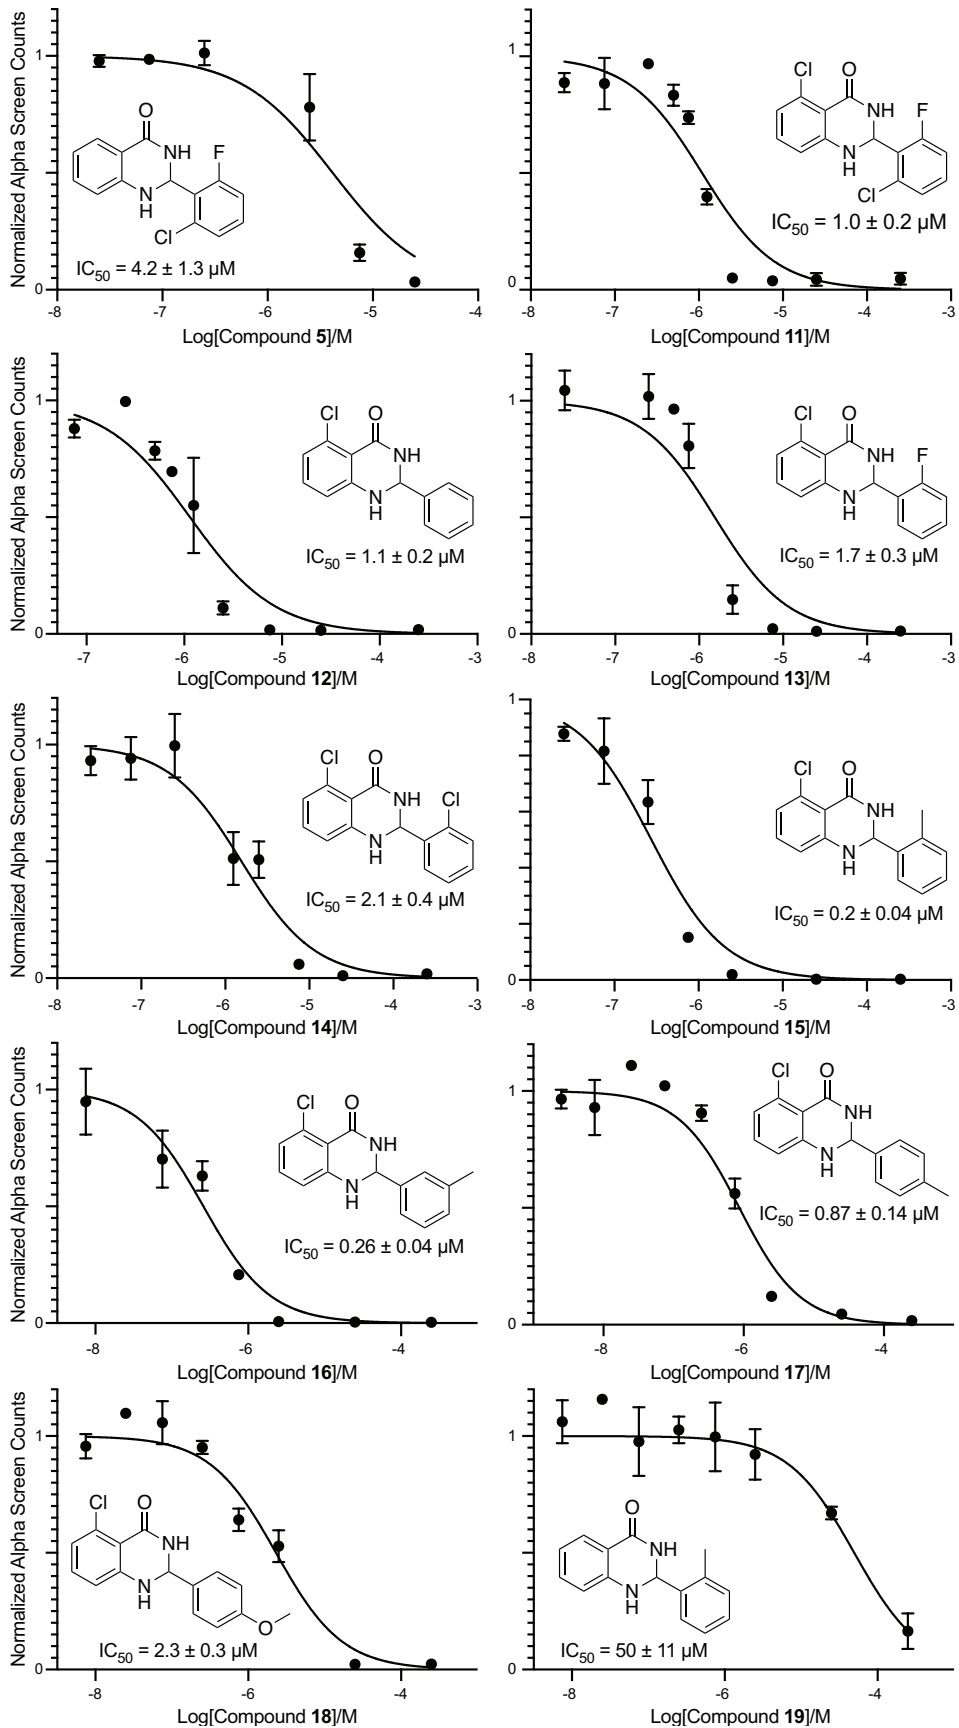

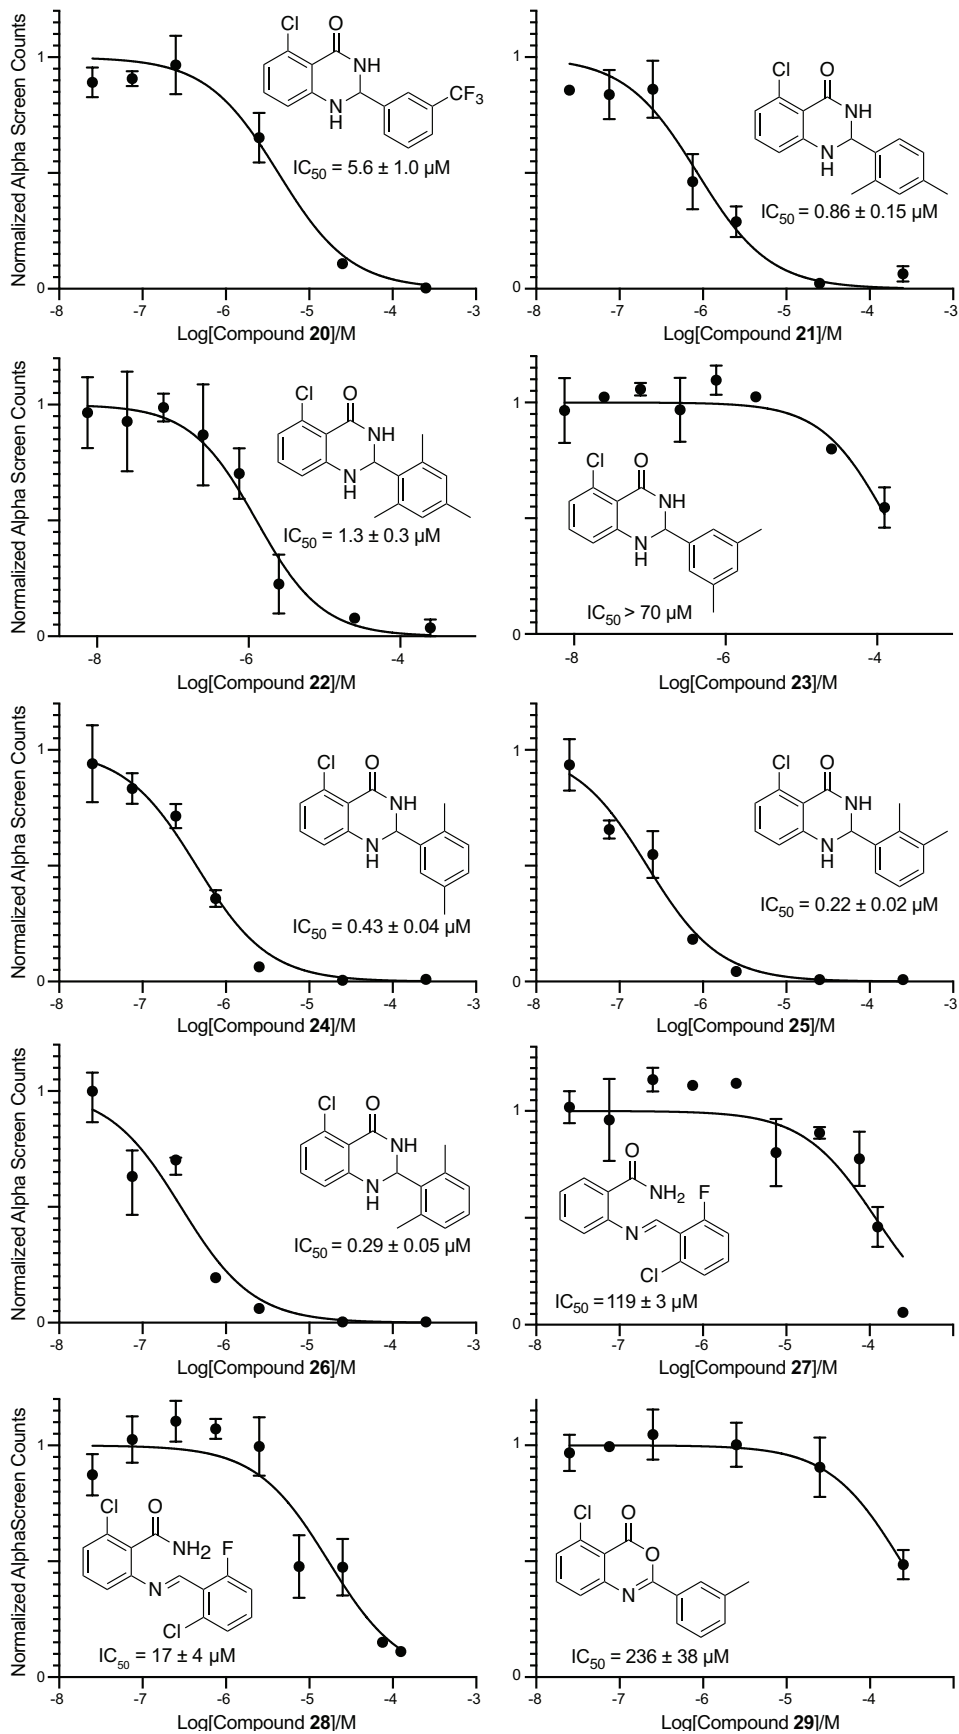

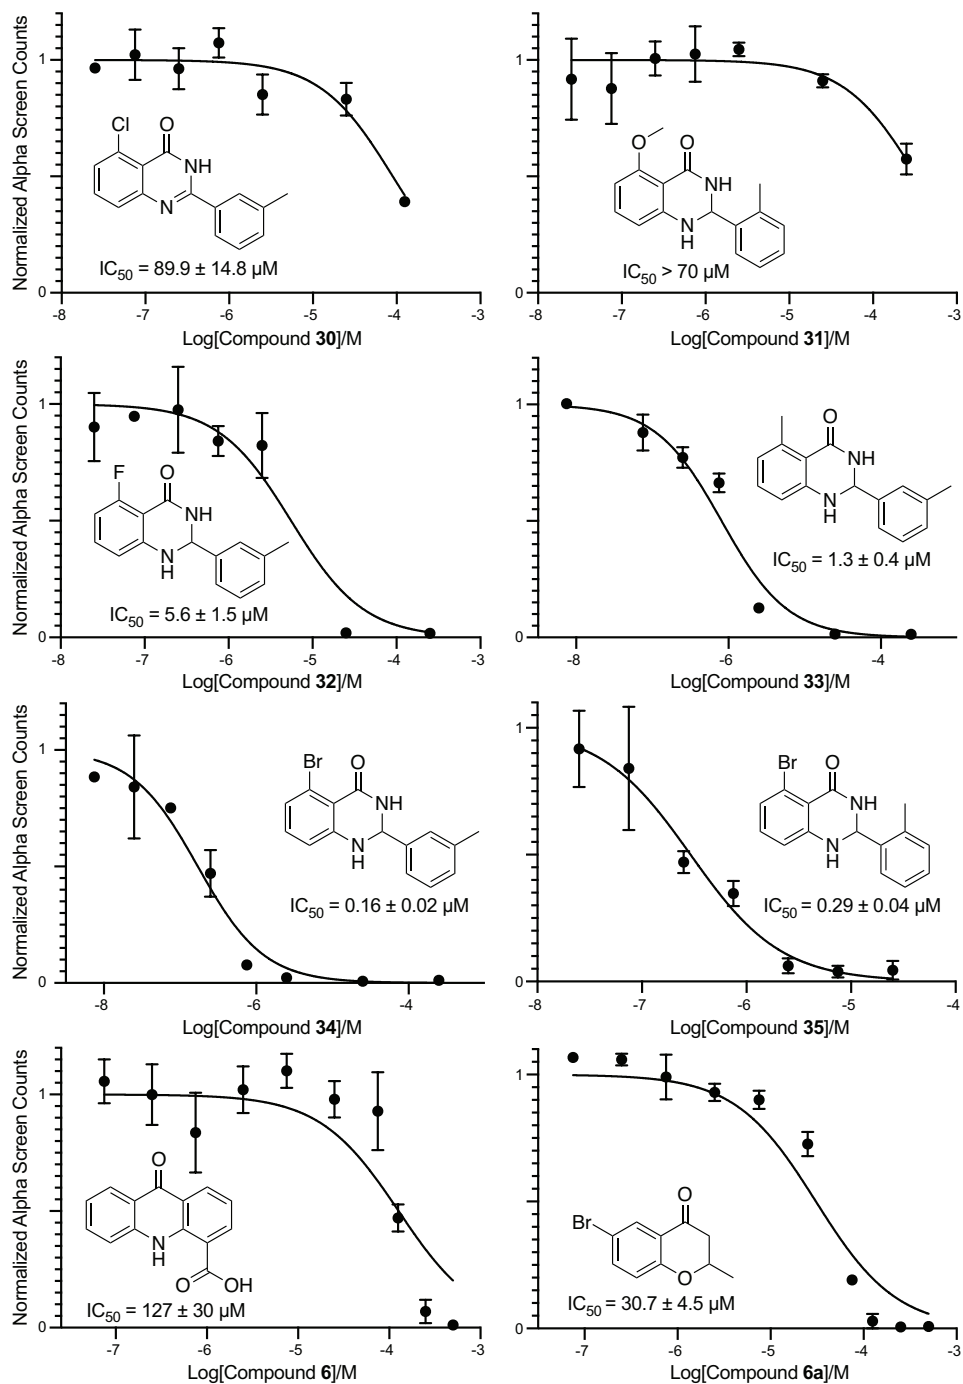

**Figure S12.** IC<sub>50</sub> curves from AlphaScreen assays using 0.2 μM His<sub>6</sub>-tagged PBRM1-BD2 and 0.1 μM biotinylated H3K14Ac (residues 1-20) peptide.



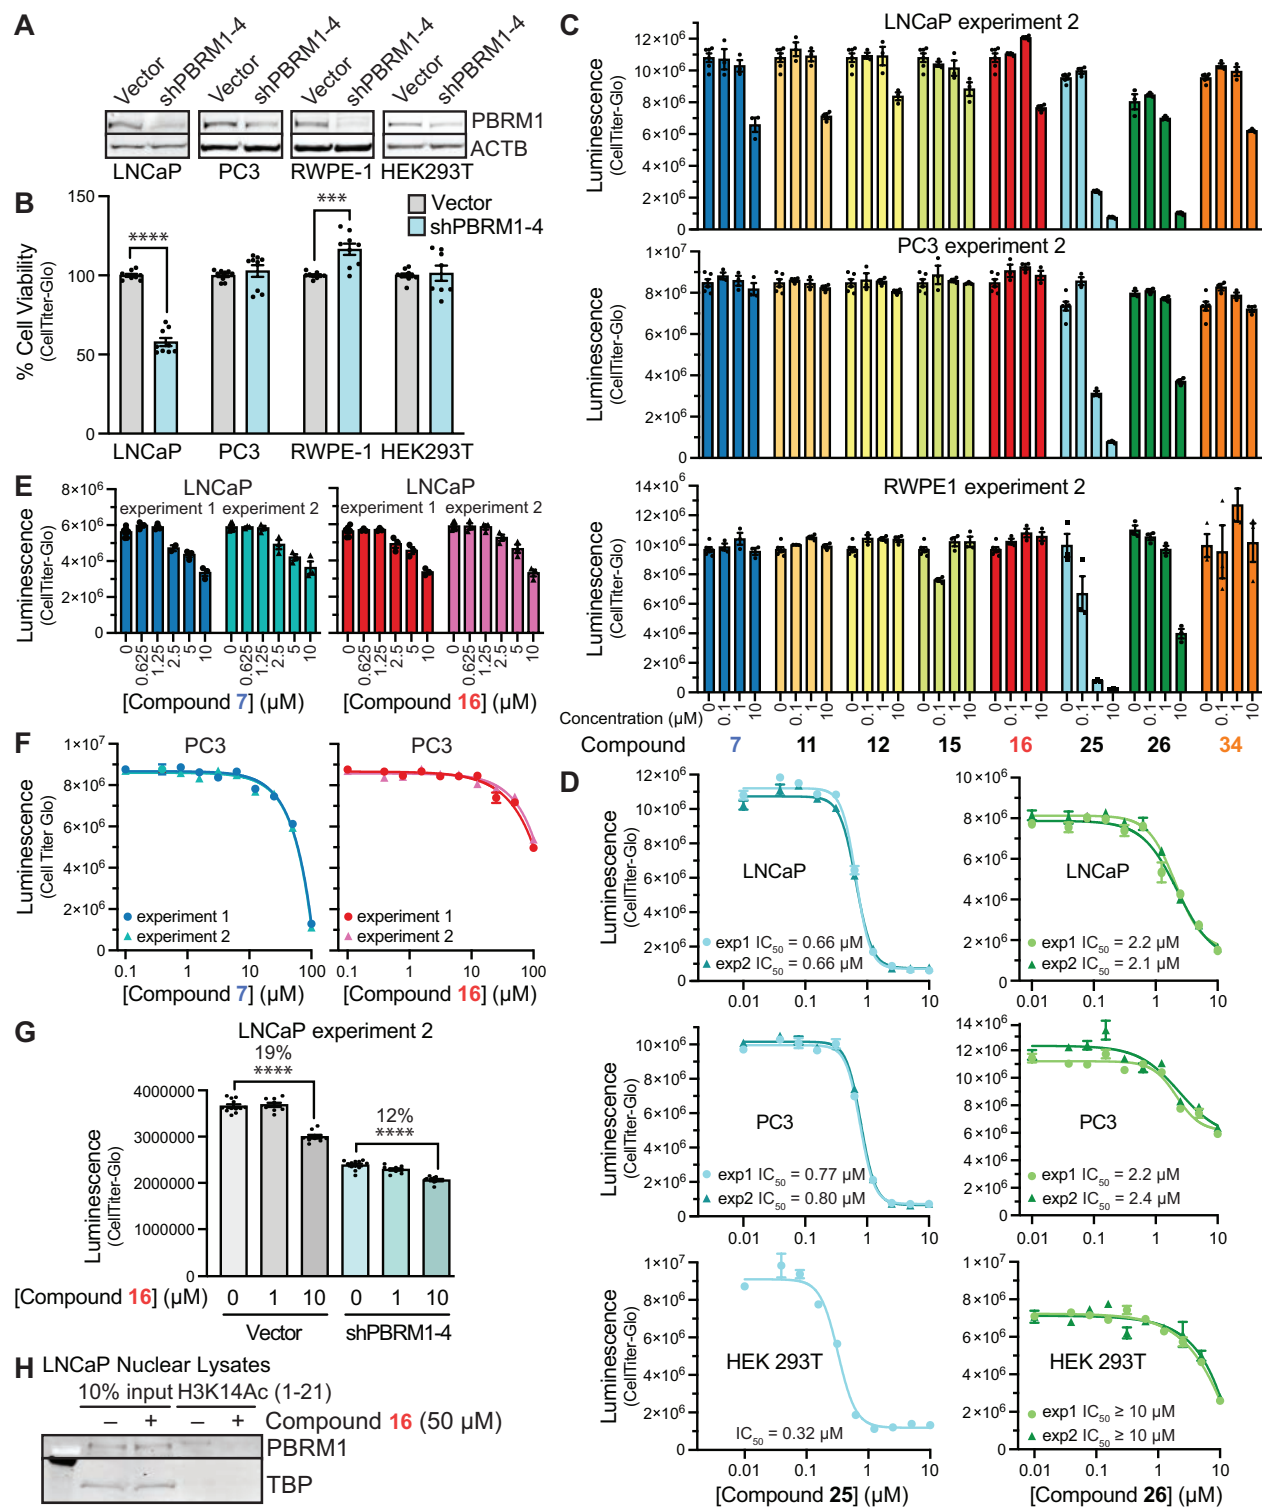

**Figure S13.** Cellular activity of PBRM1-BD2 inhibitors. (A) Immunoblot of lysates from human cell lines with lentiviral expression of shRNA against PBRM1 or vector control shRNA. (B) Cell viability after 6 days incubation of cell lines expressing lentiviral shPBRM1 or vector control. (C) Repeat of experiment in Figure 7C. Prostate cell line viability after 5 days treatment with 0, 0.1, 1, or 10  $\mu\text{M}$  of indicated PBRM1 bromodomain inhibitors. Viability was measured as luminescence units using CellTiter-Glo<sup>®</sup>.  $n = 3$  for

compound treatments; n = 6 for DMSO alone. (D) Concentrative curve measurement for compounds **25** and **26** treatment in LNCaP, PC3, and HEK293T cells. Assay performed as described in Figure S13A. IC<sub>50</sub> values were calculated from variable slope dose curve generated using GraphPad Prism. (E/F) Viability of (E) LNCaP and (F) PC3 prostate cancer cell lines treated with indicated concentrations of compounds **7** and **16**. Assay performed as described in S13A. (G) Repeat of experiment in Figure 7E. The viability of LNCaP cells expressing shRNA against *PBRM1* (shPBRM1) or vector control after 5 days treatment with 0, 1, or 10 μM compound **16**. Viability was measured as luminescence units using CellTiter-Glo®. n = 9-12; \*\*\*\* *p* < 0.0001. Significance calculated using Student's *t*-test. (H) Immunoblot analysis after streptavidin-mediated peptide pull-downs with biotinylated H3 or H3K14Ac peptide from LNCaP nuclear lysate containing 150 mM NaCl. Enrichment of PBRM1 and TATA binding protein (TBP) was determined by immunoblot analysis.

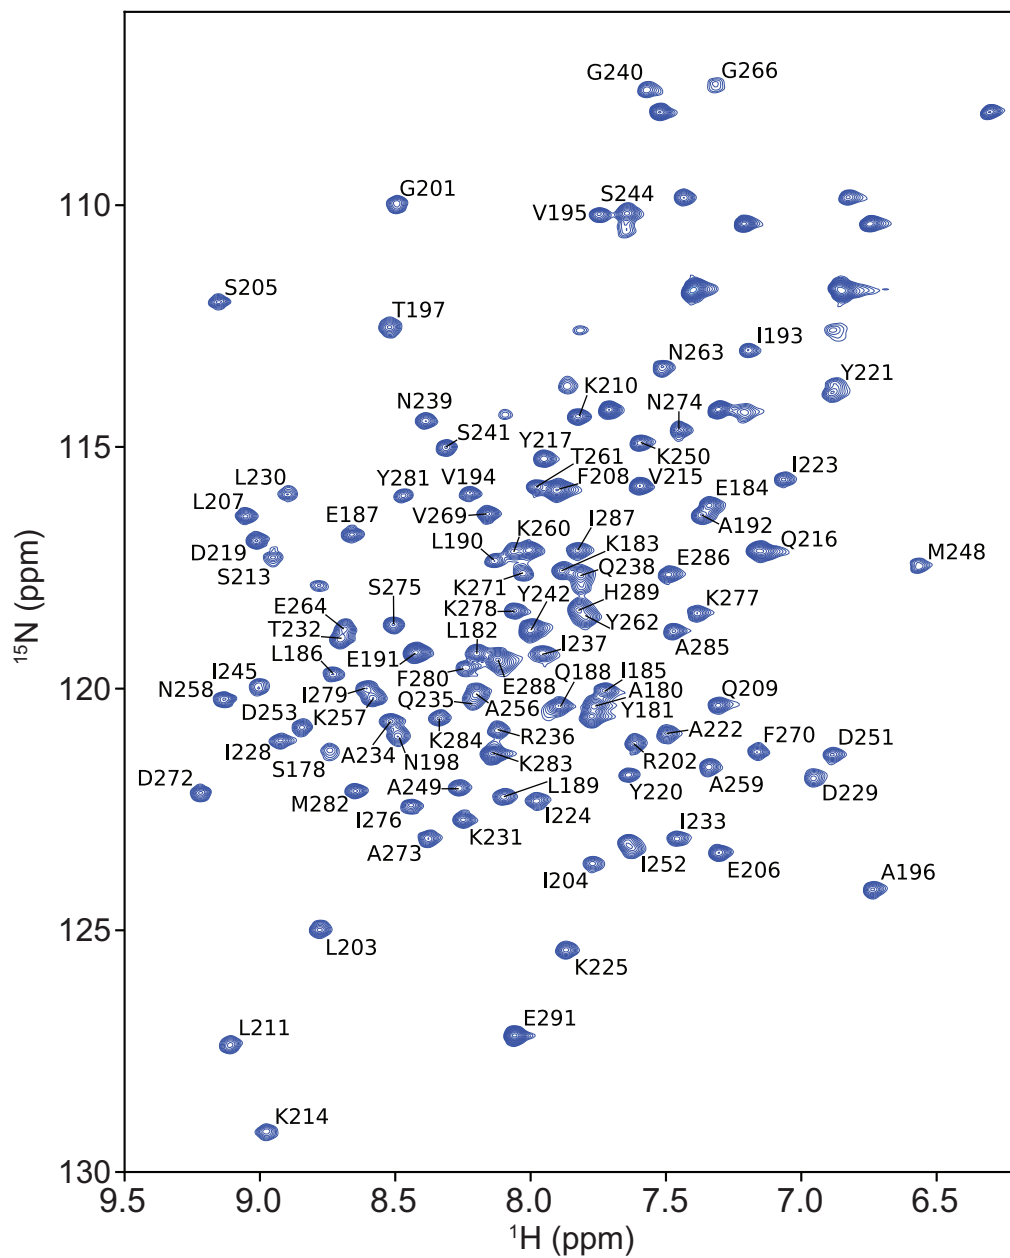

**Figure S14.**  $^1\text{H}$ - $^{15}\text{N}$  HSQC spectrum of apo U- $^{15}\text{N}$ -PBRM1-BD2 (600  $\mu\text{M}$ ) with resonances labeled with their amino acid assignments. The chemical shifts for these assignments were deposited in the Biological Magnetic Resonance Bank (BMRB ID 51472).

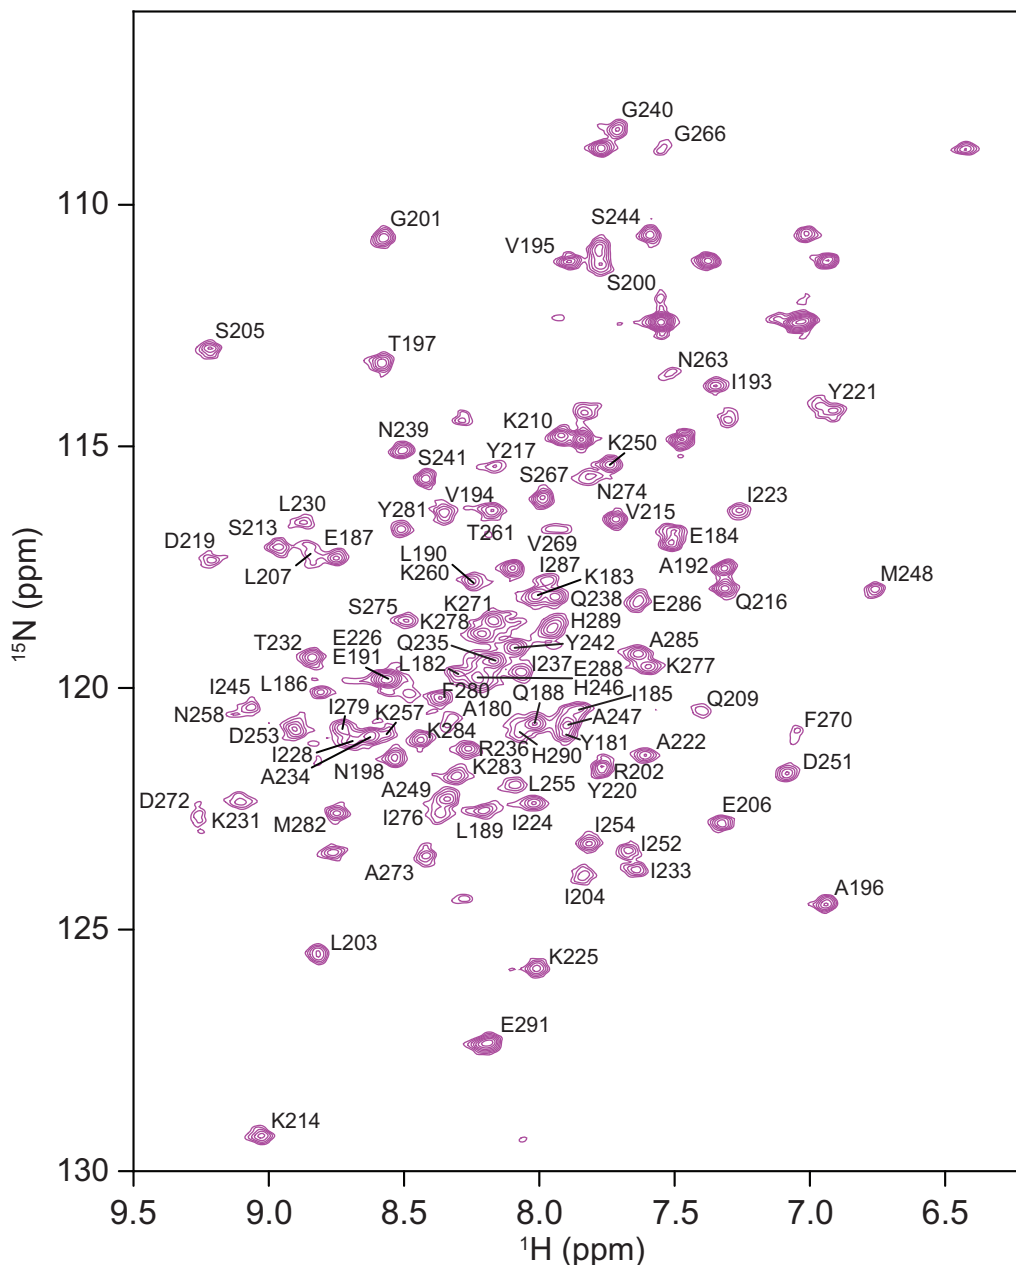

**Figure S15.**  $^1\text{H}$ - $^{15}\text{N}$  HSQC spectrum of  $\text{U-}^{15}\text{N}$ -PBRM1-BD2 (600  $\mu\text{M}$ ), in presence of **16** (750  $\mu\text{M}$ ), with resonances labeled with their amino acid assignments. The chemical shifts for these assignments were deposited in the Biological Magnetic Resonance Bank (BMRB ID 51450).

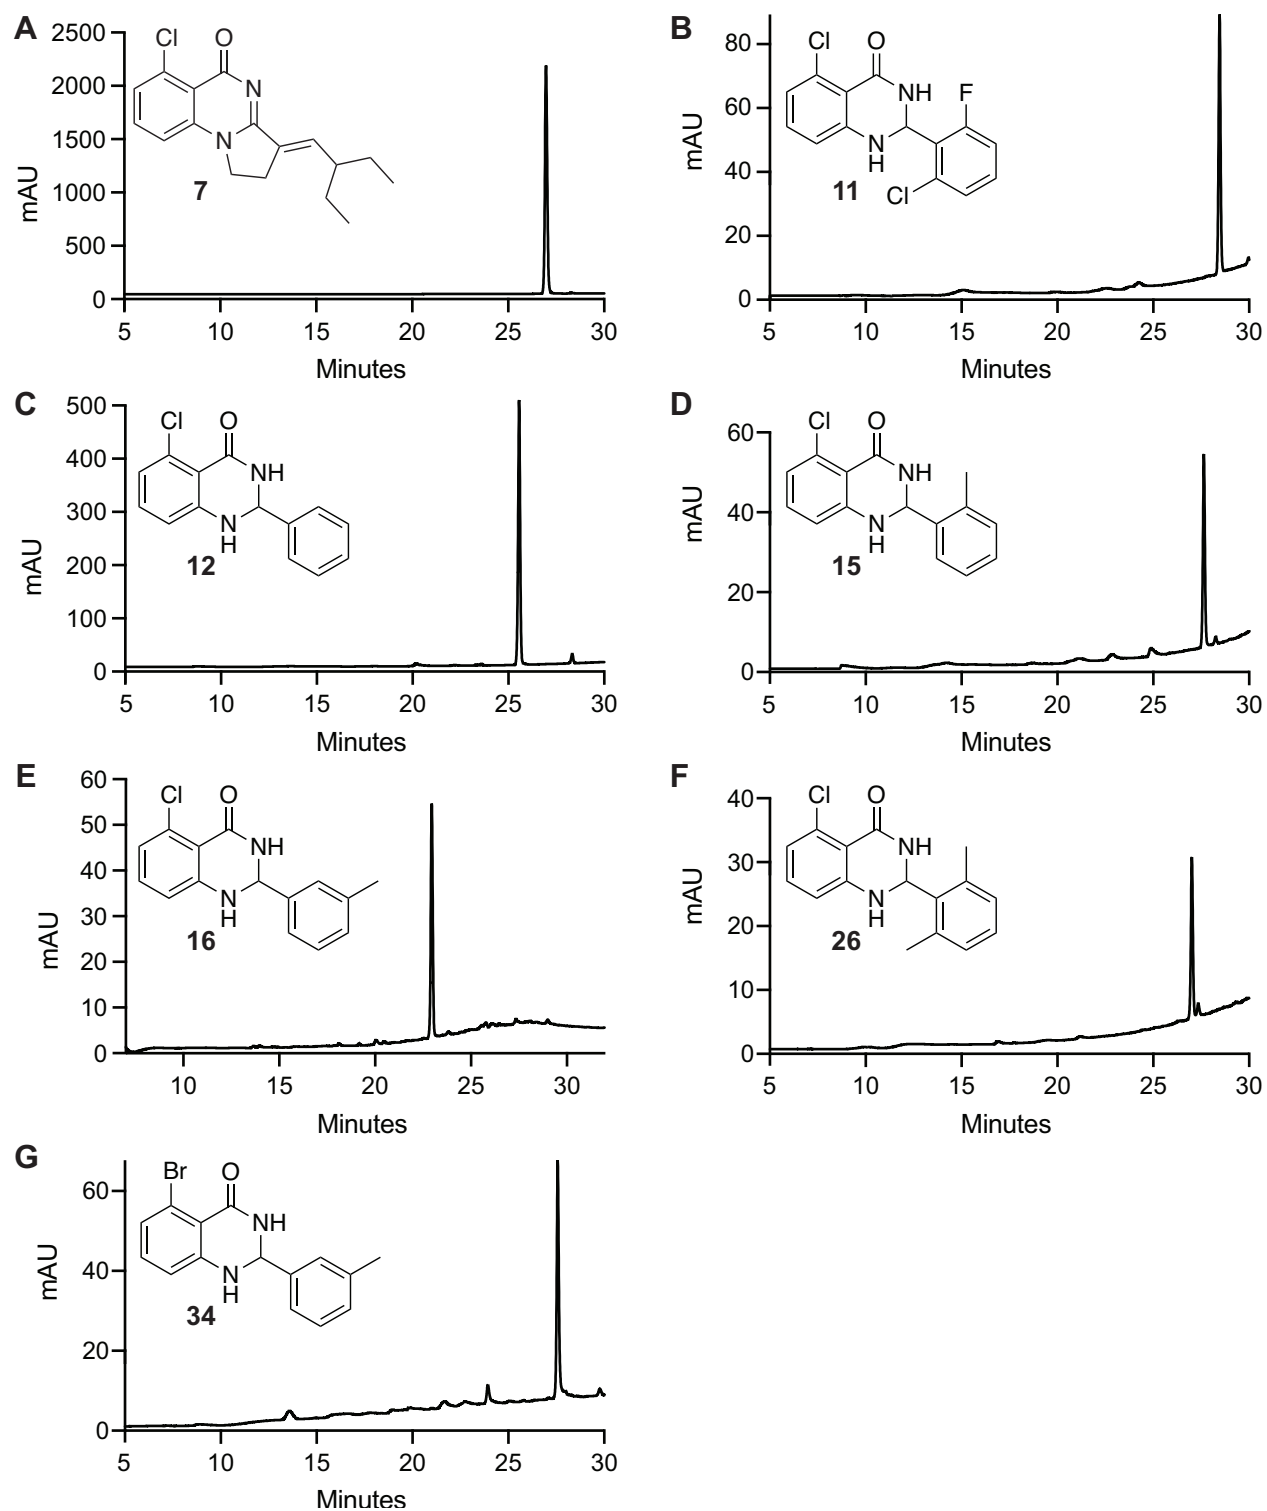

**Figure S16.** HPLC chromatograms of promising lead PBRM1 bromodomain inhibitors evaluated in cellular assays. The peak with the greatest magnitude on each chromatogram corresponds to the respective compound with >95% purity. (A) Compound **7**. (B) Compound **11**. (C) Compound **12**. (D) Compound **15**. (E) Compound **16**. (F) Compound **26**. (G) Compound **34**.

**Table S1.** Comparison of the ability of our synthesized PBRM1-BD2 inhibitors (**15**, **16**, **25**, **26**, and **34**) vs. literature reported PBRM1-BD5 inhibitors (**2** and **7**) to stabilize bromodomains belonging to different bromodomain subfamilies as observed by differential scanning fluorimetry (DSF) assays.

| $\Delta T_m$ (°C) | < 1       | 1-2                    | 2-3       | 3-5       | >5        |           |          |         |       |         |      |
|-------------------|-----------|------------------------|-----------|-----------|-----------|-----------|----------|---------|-------|---------|------|
| Compound          | PBRM1-BD1 | PBRM1-BD2 <sup>a</sup> | PBRM1-BD3 | PBRM1-BD4 | PBRM1-BD5 | PBRM1-BD6 | SMARCA2B | SMARCA4 | ASH1L | TRIM33B | BRD7 |
| <b>2</b>          | -0.1      | 3.3 ± 0.4              | 2.6       | 0.3       | 7.7       | -1.4      | 2.2      | 2       | -0.7  | -0.9    | 1.2  |
| <b>7</b>          | -0.9      | 7.7 ± 0.2              | 2.8       | 3.9       | 11.0      | -1.5      | 3.0      | 3.1     | -0.7  | 0.3     | 0.4  |
| <b>15</b>         | -0.8      | 5.4 ± 0.1              | 2.7       | 0.9       | 2.9       | -2        | 0.5      | 0.4     | -0.6  | 0.8     | 0.2  |
| <b>16</b>         | -0.1      | 5.4 ± 0.2              | 1.8       | 0.8       | 1.8       | -1.9      | 0.4      | 0.3     | -0.6  | 0.9     | 0.0  |
| <b>25</b>         | -0.3      | 3.9 ± 0.3              | 1.9       | 0.2       | 0.9       | -1.3      | 0.0      | -0.4    | -0.8  | 0.3     | 0.0  |
| <b>26</b>         | -0.5      | 5.2 ± 0.3              | 5.0       | 1.0       | 4.4       | -1.2      | 0.5      | 0.6     | -0.8  | 0.5     | 0.1  |
| <b>34</b>         | 1.4       | 6.4 ± 0.2              | 0.6       | 0.2       | 1.5       | -2.4      | 0.3      | -0.2    | -0.4  | 0.1     | -0.4 |

  

| Compound  | CREBBP | p300 | BRD2-BD2 | BRD3-BD1 | BRD3-BD2 | BRD4-BD1 | BRD4-BD2 | BRDT-BD1 | CECR2 | PCAF |
|-----------|--------|------|----------|----------|----------|----------|----------|----------|-------|------|
| <b>2</b>  | 0.1    | -0.6 | -0.2     | 0.1      | 0.5      | 0.1      | -0.6     | -0.1     | 2.0   | -0.2 |
| <b>7</b>  | -0.7   | -0.5 | 0.6      | -0.3     | 0.4      | -0.2     | -1.1     | -0.8     | -0.9  | 0.4  |
| <b>15</b> | 0.5    | 0.2  | 0.6      | 0.3      | 0.4      | 0.1      | -3.3     | -0.7     | -0.5  | 0.5  |
| <b>16</b> | 0.4    | -0.2 | 0.6      | 0.3      | 0.4      | 0.3      | -3.9     | -0.1     | -1.3  | 0.5  |
| <b>25</b> | 0.6    | 0.6  | 0.2      | 0.4      | 0.4      | 0.6      | -4.2     | 0.1      | 0.8   | 0.1  |
| <b>26</b> | 0.2    | 0.2  | 0.5      | 0.0      | 0.3      | 0        | -4.4     | -0.6     | 1.3   | 0.6  |
| <b>34</b> | -0.2   | -0.1 | 0.5      | 0.4      | 0.5      | 0.3      | -1.1     | -0.4     | -0.6  | 0.6  |

<sup>a</sup>Values shown are the average of triplicates.

**Table S2.** Binding of the analogs of the second-best hit (**6**) to PBRM1-BD2 as observed by DSF and AlphaScreen assays.

| Compound  | Structure                                                                           | PBRM1-BD2         | IC <sub>50</sub> values |
|-----------|-------------------------------------------------------------------------------------|-------------------|-------------------------|
|           |                                                                                     | $\Delta T_m$ (°C) | ( $\mu$ M)              |
| <b>6</b>  | 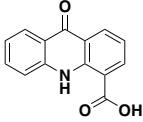   | $1.5 \pm 1.0$     | $127 \pm 30^a$          |
| <b>36</b> |    | $1.4 \pm 0.2$     | $26^b$                  |
| <b>37</b> |    | $3.0 \pm 0.1$     | $7^b$                   |
| <b>38</b> |   | $0.3 \pm 0.02$    | $>250^b$                |
| <b>39</b> |  | 0                 | $>250^b$                |

<sup>a</sup>Values shown are the average of triplicate. <sup>b</sup>Values shown are single replicate.

**Scheme S1.** Synthetic route to compounds **7** and **8**.<sup>1</sup>

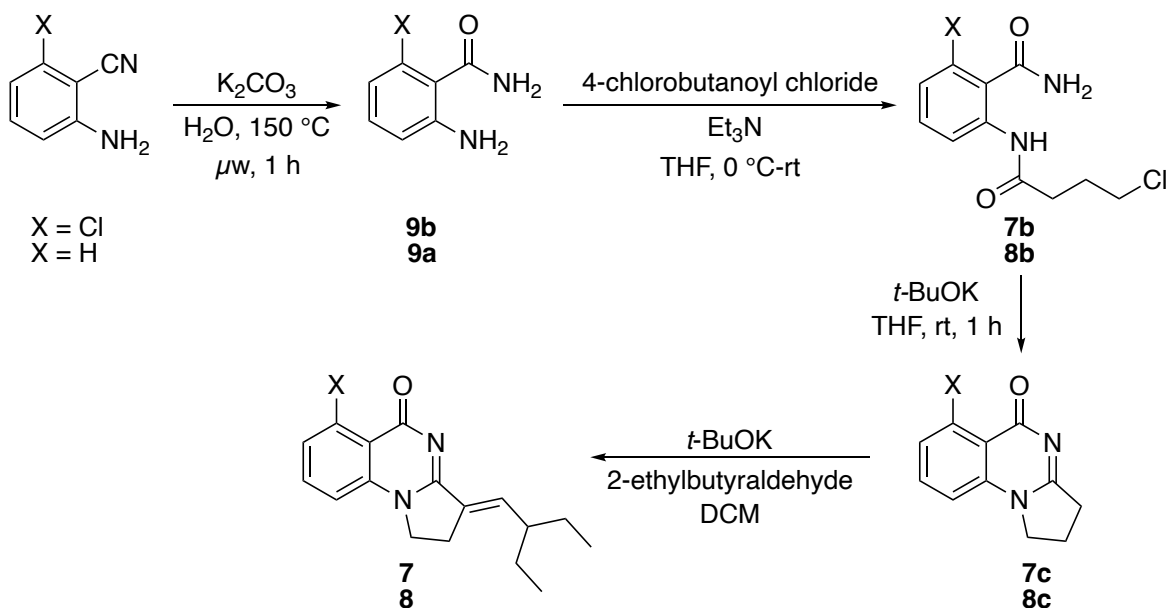

**Scheme S2.** Synthetic route to compounds **27** and **28**.

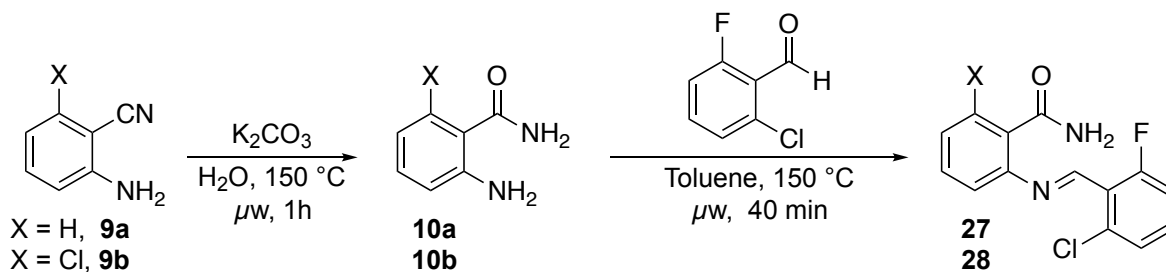

**Scheme S3.** Synthetic route to benzoxazin-4-one<sup>2</sup> (**29**) and quinazolin-4-one<sup>3</sup> (**30**).

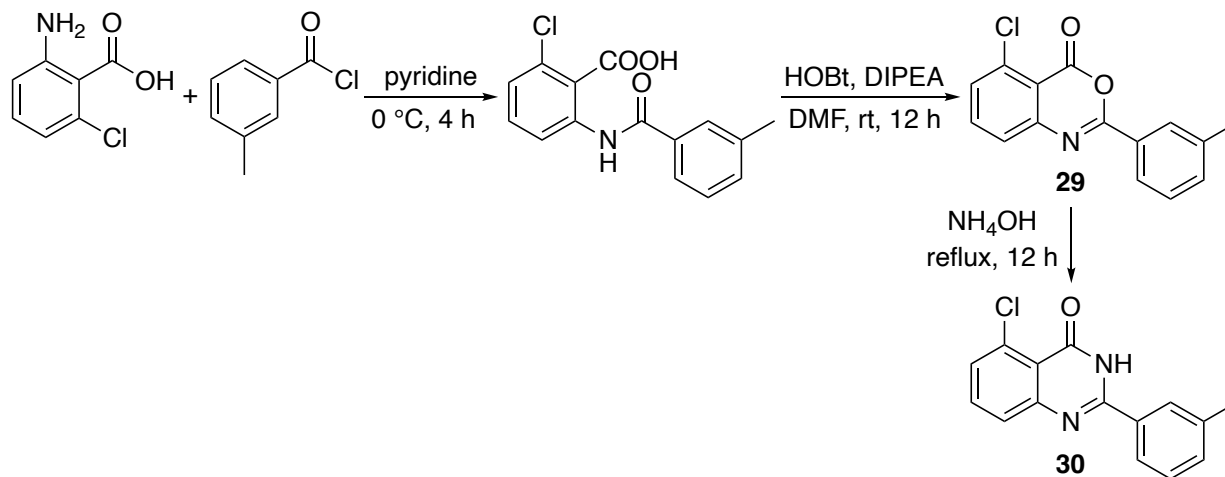



**Scheme S4.** Synthetic route to literature compound **2**.<sup>1</sup>

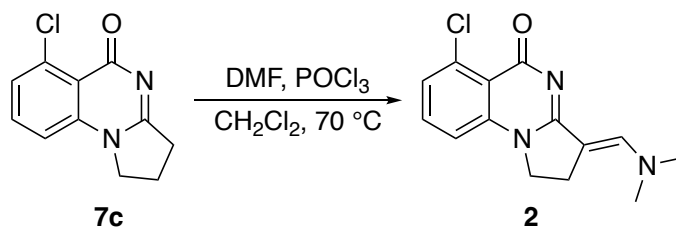

**Scheme S5.** Synthetic route to analogs of **6**.<sup>4</sup>

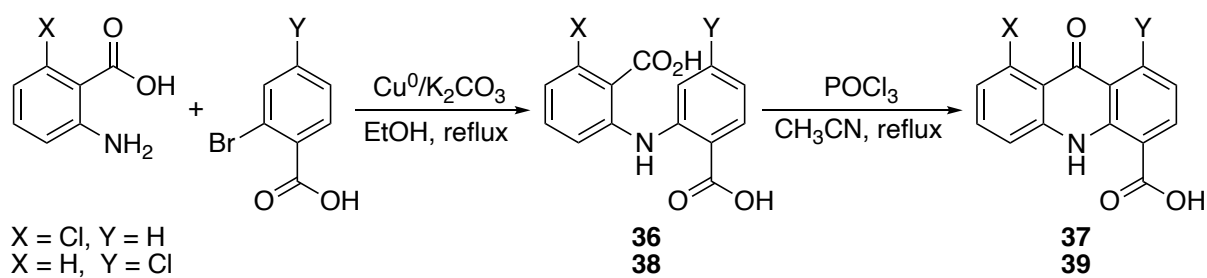

**Scheme S6.** General Procedure A: Synthesis of aminobenzamides.<sup>1</sup>

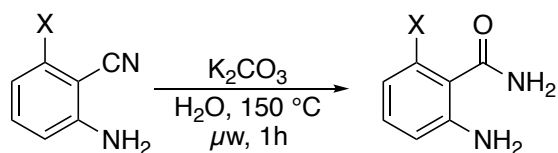

**Scheme S7.** General Procedure B: Synthesis of 2,3-dihydroquinazalinones.<sup>5</sup>

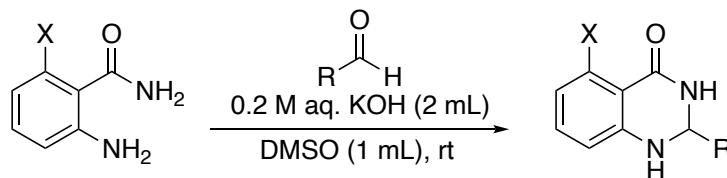

## References

1. Sutherell, C. L.; Tallant, C.; Monteiro, O. P.; Yapp, C.; Fuchs, J. E.; Fedorov, O.; Siejka, P.; Müller, S.; Knapp, S.; Brenton, J. D.; Brennan, P. E.; Ley, S. V. Identification and Development of 2,3-Dihydropyrrolo[1,2-a]quinazolin-5(1H)-one Inhibitors Targeting Bromodomains within the Switch/Sucrose Nonfermenting Complex. *Journal of Medicinal Chemistry* **2016**, *59*, 5095-5101.
2. Jin, S.; Liu, Z.; Milburn, C.; Tomaszewski, M.; Walpole, C.; Wei, Z.-Y.; Yang, H. Preparation of Benzamide Derivatives for Therapeutic Use as Cannabinoid Receptor Modulators. WO2005115972A1, 2005.
3. Pieterse, L.; Van Der Walt, M. M.; Terre'Blanche, G. C2-Substituted Quinazolinone Derivatives Exhibit A<sub>1</sub> and/or A<sub>2A</sub> Adenosine Receptor Affinities in the Low Micromolar Range. *Bioorganic & Medicinal Chemistry Letters* **2020**, *30*, 127274.
4. Dörner, B.; Kuntner, C.; Bankstahl, J. P.; Wanek, T.; Bankstahl, M.; Stanek, J.; Müllauer, J.; Bauer, F.; Mairinger, S.; Löscher, W.; Miller, D. W.; Chiba, P.; Müller, M.; Erker, T.; Langer, O. Radiosynthesis and in Vivo Evaluation of 1-[<sup>18</sup>F]fluoroelacridar as a Positron Emission Tomography Tracer for P-Glycoprotein and Breast Cancer Resistance Protein. *Bioorganic & Medicinal Chemistry* **2011**, *19*, 2190-2198.
5. Dutta, A.; Damarla, K.; Bordoloi, A.; Kumar, A.; Sarma, D. Koh/DmsO: A Basic Suspension for Transition Metal-Free Tandem Synthesis of 2,3-Dihydroquinazolin-4(1H)-ones. *Tetrahedron Letters* **2019**, *60*, 1614-1619.
